# Supplementary material for: Trophic niches reflect compositional differences in microbiota among Caribbean sea urchins
Source: PeerJ. 2021 Aug 31;9:e12084. doi: 10.7717/peerj.12084 (PMC8415288; doi:10.7717/peerj.12084)
Supplement: Supplemental Information 2 [file peerj-09-12084-s002.xlsx]

## Sheet: sample_type_stats
Supplementary Table 2 Overall statistics
1. Nonparametric t-test using Monte Carlo permutations to calculate the p-values for alpha diversity among sample types (Fig2)
Group1	Group2	Group1 mean	Group1 std	Group2 mean	Group2 std	t stat	p-value
3Gut	2Seagrass	436.846	170.18	1012.19	61.6245	-5.73118	0.003	***
1Water	2Seagrass	1799.7	262.674	1012.19	61.6245	4.12785	0.336
1Water	3Gut	1799.7	262.674	436.846	170.18	12.8043	0.003	***
2. Permanova test for betadiversity among sample types (Fig 2)				2. ANOSIM test for betadiversity among sample types (Fig 2)
method name	PERMANOVA			method name	ANOSIM
test statistic name	pseudo-F			test statistic name	R
sample size	60			sample size	60
number of groups	3			number of groups	3
test statistic	12.751			test statistic	0.978124
p-value	0.01	***		p-value	0.01	**
number of permutations	999			number of permutations	99
3. Nonparametric t-test using Monte Carlo permutations to calculate the p-values for alpha diversity among species (Fig3)
Group1	Group2	Group1 mean	Group1 std	Group2 mean	Group2 std	t stat	p-value
Tripneustes_ventricosus	Lytechinus_variegatus	4.24277	1.17903	6.13709	0.975669	-2.49367	0.108
Echinometra_lucunter	Diadema_antillarum	4.08895	0.788176	4.1929	0.865545	-0.35557	1
Echinometra_lucunter	Lytechinus_variegatus	4.08895	0.788176	6.13709	0.975669	-3.82098	0.006	**
Tripneustes_ventricosus	Echinometra_lucunter	4.24277	1.17903	4.08895	0.788176	0.442818	1
Tripneustes_ventricosus	Diadema_antillarum	4.24277	1.17903	4.1929	0.865545	0.133563	1
Lytechinus_variegatus	Diadema_antillarum	6.13709	0.975669	4.1929	0.865545	3.30714	0.048	*
4. Permanova test for betadiversity among species (Fig 3)				4. ANOSIM test for betadiversity among sample types (Fig 3)
method name	PERMANOVA			method name	ANOSIM
test statistic name	pseudo-F			test statistic name	R
sample size	54			sample size	54
number of groups	4			number of groups	4
test statistic	2.04395			test statistic	0.12477
p-value	0.004	***		p-value	0.01
number of permutations	999			number of permutations	99
5. Nonparametric t-test using Monte Carlo permutations to calculate the p-values for alpha diversity among sites (Fig4)
Group1	Group2	Group1 mean	Group1 std	Group2 mean	Group2 std	t stat	p-value
Luquillo	Cerro Gordo	415.419	157.593	469.054	164.573	-0.941553	1
Catano	Luquillo	453.199	176.897	415.419	157.593	0.661836	1
Catano	Cerro Gordo	453.199	176.897	469.054	164.573	-0.272809	1
6. Permanova test for betadiversity among sites (Fig 4)				6. ANOSIM test for betadiversity among sites (Fig 4)
method name	PERMANOVA			method name	ANOSIM
test statistic name	pseudo-F			test statistic name	R
sample size	54			sample size	54
number of groups	3			number of groups	3
test statistic	2.35166			test statistic	0.0656834
p-value	0.001	***		p-value	0.01	**
number of permutations	999			number of permutations	99
7. Nonparametric t-test using Monte Carlo permutations to calculate the p-values for alpha diversity among sites and species (Panel D, Figure 4)
Group1	Group2	Group1 mean	Group1 std	Group2 mean	Group2 std	t stat	p-value
3red_Catano	1green_Catano	505.585	107.564	676.905	246.321	-1.27836	1
2Black_Catano	4white_Luquillo	390.483	126.098	370.494	112.575	0.23651	1
1green_Catano	2Black_Cerro Gordo	676.905	246.321	449.738	174.411	1.31817	1
4white_Catano	2Black_Cerro Gordo	341.225	74.6207	449.738	174.411	-1.24821	1
2Black_Catano	4white_Cerro Gordo	390.483	126.098	459.684	212.768	-0.57858	1
2Black_Cerro Gordo	4white_Luquillo	449.738	174.411	370.494	112.575	0.763476	1
2Black_Catano	3red_Luquillo	390.483	126.098	335.941	139.898	0.60892	1
1green_Catano	3red_Cerro Gordo	676.905	246.321	494.521	71.2147	1.48054	1
1green_Catano	2Black_Catano	676.905	246.321	390.483	126.098	1.87856	1
2Black_Cerro Gordo	4white_Cerro Gordo	449.738	174.411	459.684	212.768	-0.0757018	1
2Black_Catano	2Black_Cerro Gordo	390.483	126.098	449.738	174.411	-0.550638	1
4white_Catano	4white_Luquillo	341.225	74.6207	370.494	112.575	-0.466139	1
3red_Catano	4white_Catano	505.585	107.564	341.225	74.6207	2.80736	0.36
3red_Catano	2Black_Luquillo	505.585	107.564	532.334	136.261	-0.34454	1
2Black_Cerro Gordo	2Black_Luquillo	449.738	174.411	532.334	136.261	-0.797179	1
4white_Cerro Gordo	3red_Luquillo	459.684	212.768	335.941	139.898	1.08662	1
3red_Cerro Gordo	3red_Luquillo	494.521	71.2147	335.941	139.898	2.25885	1
4white_Catano	2Black_Catano	341.225	74.6207	390.483	126.098	-0.72627	1
3red_Cerro Gordo	2Black_Cerro Gordo	494.521	71.2147	449.738	174.411	0.519331	1
4white_Catano	4white_Cerro Gordo	341.225	74.6207	459.684	212.768	-1.17478	1
2Black_Luquillo	3red_Luquillo	532.334	136.261	335.941	139.898	2.24868	1
4white_Catano	3red_Luquillo	341.225	74.6207	335.941	139.898	0.0745095	1
3red_Catano	4white_Luquillo	505.585	107.564	370.494	112.575	1.8367	1
4white_Catano	3red_Cerro Gordo	341.225	74.6207	494.521	71.2147	-3.32317	0.27
1green_Catano	3red_Luquillo	676.905	246.321	335.941	139.898	2.33136	1
3red_Catano	4white_Cerro Gordo	505.585	107.564	459.684	212.768	0.430506	1
4white_Catano	2Black_Luquillo	341.225	74.6207	532.334	136.261	-2.75068	1
3red_Catano	2Black_Cerro Gordo	505.585	107.564	449.738	174.411	0.587875	1
3red_Catano	3red_Cerro Gordo	505.585	107.564	494.521	71.2147	0.19177	1
3red_Catano	2Black_Catano	505.585	107.564	390.483	126.098	1.4777	1
3red_Cerro Gordo	2Black_Luquillo	494.521	71.2147	532.334	136.261	-0.549931	1
1green_Catano	4white_Luquillo	676.905	246.321	370.494	112.575	2.0747	1
1green_Catano	4white_Catano	676.905	246.321	341.225	74.6207	2.70605	1
4white_Cerro Gordo	4white_Luquillo	459.684	212.768	370.494	112.575	0.763462	1
1green_Catano	2Black_Luquillo	676.905	246.321	532.334	136.261	0.998614	1
2Black_Catano	3red_Cerro Gordo	390.483	126.098	494.521	71.2147	-1.55459	1
3red_Cerro Gordo	4white_Cerro Gordo	494.521	71.2147	459.684	212.768	0.34719	1
3red_Luquillo	4white_Luquillo	335.941	139.898	370.494	112.575	-0.4026	1
3red_Cerro Gordo	4white_Luquillo	494.521	71.2147	370.494	112.575	2.00639	1
2Black_Catano	2Black_Luquillo	390.483	126.098	532.334	136.261	-1.60845	1
2Black_Luquillo	4white_Cerro Gordo	532.334	136.261	459.684	212.768	0.642958	1
2Black_Cerro Gordo	3red_Luquillo	449.738	174.411	335.941	139.898	1.08596	1
1green_Catano	4white_Cerro Gordo	676.905	246.321	459.684	212.768	1.20673	1
3red_Catano	3red_Luquillo	505.585	107.564	335.941	139.898	2.14958	1
2Black_Luquillo	4white_Luquillo	532.334	136.261	370.494	112.575	1.91796	1
8. Nonparametric t-test using Monte Carlo permutations to calculate the p-values for alpha diversity among trophic niche (Fig5)
Group1	Group2	Group1 mean	Group1 std	Group2 mean	Group2 std	t stat	p-value
Seagrass	Reef	434.432	200.399	453.276	146.206	-0.389854	0.704
9. Permanova test for betadiversity among trophic niches (Fig 5)				9. Anosim test for betadiversity among trophic niches (Fig 5)
method name	PERMANOVA			method name	ANOSIM
test statistic name	pseudo-F			test statistic name	R
sample size	54			sample size	54
number of groups	2			number of groups	2
test statistic	2.40542			test statistic	0.166852
p-value	0.007	***		p-value	0.01
number of permutations	999			number of permutations	99
